# Supplementary material
Source: publisher site journal article supplement (https://www.spandidos-publications.com/281/downloadSupplementary)

Figure S1. 1,25(OH)<sub>2</sub>D<sub>3</sub> could not induce apoptosis. Cells were treated with 10 nM of 1,25(OH)<sub>2</sub>D<sub>3</sub>. Morphologic assessment of apoptosis detected by Hoechst 33342 under fluorescence microscopy. Original magnification, x1,000 (scale bar=10 μm). Three independent experiments were undertaken. 1,25(OH)<sub>2</sub>D<sub>3</sub>, 1,25-dihydroxyvitamin D<sub>3</sub>.

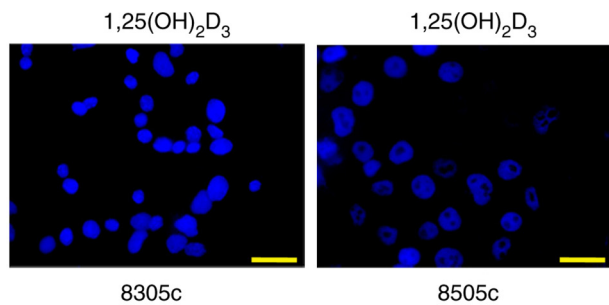

Supplement: Supplementary file 1 [file downloadSupplementary]
